# Supplementary material
Source: HighWire-hosted journal article supplement (http://rc.rcjournal.com/highwire/filestream/11948/field_highwire_adjunct_files/2/Table_1_Demographics_updated_1_2015_of_Parents.docx)
Supplement: Table_1_Demographics_updated_1_2015_of_Parents.docx [file Table_1_Demographics_updated_1_2015_of_Parents.docx]

**Table 1 – Demographics of Parents**

| **Parent Demographics of Sample** | |
| --- | --- |
| Demographics | Sample, n= 44 (n%) |
| ***Gender**** | |
| Female | 28 (65.12%) |
| Male | 15 (34.88%) |
| **Race/Ethnicity**† |  |
| White | 33 (78.57%) |
| Black | 4 (9.52%) |
| Hispanic | 2 (4.76%) |
| Indian | 1 (2.38%) |
| Caribbean | 2 (4.76%) |
| **Age**† |  |
| 35-40 years | 1 (2.38%) |
| 41-45 years | 4 (9.52%) |
| 46-50 years | 13 (30.95%) |
| 51-55 years | 12 (28.57%) |
| 56 years or older | 12 (28.57%) |
| **Residence*** |  |
| Southeast | 20 (46.51%) |
| Northeast | 11 (25.58%) |
| Midwest | 8 (18.60%) |
| Caribbean | 4 (9.30%) |
| **Birth Origin**† |  |
| U.S. | 33 (78.57%) |
| International | 9 (21.43%) |
| **Smoking Status** |  |
| Has smoked hookah | 10 (22.73%) |
| Has not smoked hookah | 34 (77.27%) |

* = 1 case of missing data, including 43 parent responses

† = 2 cases of missing data, including 42 parent responses
